# Supplementary material for: Identification of Synergistic, Clinically Achievable, Combination Therapies for Osteosarcoma
Source: PubMed Central journal article supplement (PMC4658502; doi:10.1038/srep16991), 2015-11-25

# Identification of Synergistic, Clinically Achievable, Combination Therapies for Osteosarcoma

**Diana Yu<sup>1,2</sup>, Elliot Kahen<sup>1,2</sup>, Christopher L. Cubitt<sup>2</sup>, Jeremy McGuire<sup>4</sup>, Jenny Kreaehling<sup>4</sup>, Jae Lee<sup>4,6</sup>, Soner Altioek<sup>4,7</sup>, Conor C. Lynch<sup>4,8</sup>, Daniel M. Sullivan<sup>2,4,9</sup>, and Damon R. Reed<sup>1,3,4,5,\*</sup>**

<sup>1</sup>Sunshine Lab, H. Lee Moffitt Cancer Center and Research Institute, Tampa, FL 33612 Florida USA

<sup>2</sup>Translational Research Lab, H. Lee Moffitt Cancer Center and Research Institute, Tampa, FL 33612 Florida USA

<sup>3</sup>Sarcoma Department, H. Lee Moffitt Cancer Center and Research Institute, Tampa, FL 33612 Florida USA

<sup>4</sup>Chemical Biology and Molecular Medicine Program, H. Lee Moffitt Cancer Center and Research Institute, Tampa, FL 33612 Florida USA

<sup>5</sup>Adolescent and Young Adult Program, H. Lee Moffitt Cancer Center and Research Institute, Tampa, FL 33612 Florida USA

<sup>6</sup>Department of Biostatistics and Bioinformatics, H. Lee Moffitt Cancer Center and Research Institute, Tampa, FL 33612 Florida USA

<sup>7</sup>Department of Anatomic Pathology, H. Lee Moffitt Cancer Center and Research Institute, Tampa, FL 33612 Florida USA

<sup>8</sup>Department of Tumor Biology, H. Lee Moffitt Cancer Center and Research Institute, Tampa, FL 33612 Florida USA

<sup>9</sup>Department of Blood and Marrow Transplantation, H. Lee Moffitt Cancer Center and Research Institute, Tampa, FL 33612 Florida USA

\*Damon.Reed@moffitt.org

# Pharmacokinetic Properties of the 54 Chemotherapy Agents Screened Against Osteosarcoma

| Chemotherapy Agents             | Vendor Source      | Mean T1/2 (hrs) | Mean Cmax (ng/ml) | Mean C <sub>ss</sub> (ng/ml) | Top Conc in single-agent screening (ng/ml) | MW (g/mol) | References                                                   |
|---------------------------------|--------------------|-----------------|-------------------|------------------------------|--------------------------------------------|------------|--------------------------------------------------------------|
| <b>Alkylators</b>               |                    |                 |                   |                              |                                            |            |                                                              |
| Palifosfamide                   | Sequoia            | 10              | 83000             | n/a                          | 83000                                      | 221.02     | Camacho et al., 2009 (1)                                     |
| Cisplatin                       | Selleckchem        | 24              | 1200              | n/a                          | 1200                                       | 300.05     | Veal et al., 2001 (2)                                        |
| Temozolomide                    | Selleckchem        | 2               | 10000             | n/a                          | 10000                                      | 194.15     | Horton et al., 2007 (3)                                      |
| TH-302                          | Sequoia            | 1               | 1000              | n/a                          | 1000                                       | 449.04     | Ganjoo et al., 2011 (4)                                      |
| Dacarbazine                     | Selleckchem        | 5               | 4000              | n/a                          | 4000                                       | 182.18     | Brendel et al., 2011 (5)                                     |
| <b>Antifolates</b>              |                    |                 |                   |                              |                                            |            |                                                              |
| Pralatrexate                    | Selleckchem        | 12              | 10000             | 10                           | 10                                         | 477.47     | Krug et al., 2000 (6)                                        |
| Pemetrexed                      | Sequoia            | 3.3             | 421000            | 20                           | 421000                                     | 427.41     | Malempati et al., 2007 (7)                                   |
| Methotrexate                    | Sequoia            | 2               | 454400            | 9000                         | 454400                                     | 454.44     | Zelcer et al., 2008 (8)                                      |
| <b>HDAC inhibitors</b>          |                    |                 |                   |                              |                                            |            |                                                              |
| Panobinostat                    | Selleckchem        | 29              | 18.5              | 5                            | 18.5                                       | 349.43     | Slingerland et al., 2014 (9)                                 |
| Romidepsin                      | Selleckchem        | 3               | 377               | 1                            | 377                                        | 540.70     | Amiri-Kordestani et al., 2013; Fouladi et al., 2006 (10, 11) |
| Vorinostat                      | Selleckchem        | 5               | 300               | n/a                          | 300                                        | 264.32     | Muscal et al., 2013 (12)                                     |
| <b>Microtubule inhibitors</b>   |                    |                 |                   |                              |                                            |            |                                                              |
| GSK923295A                      | Sequoia            | 10              | 7122              | 100                          | 7122                                       | 592.13     | Chung et al., 2012 (13)                                      |
| Docetaxel                       | Selleckchem        | 10              | 2000              | n/a                          | 2000                                       | 807.88     | Extra et al., 1993 (14)                                      |
| Ixabepilone                     | Sequoia            | 15              | 100               | 4.6                          | 100                                        | 506.70     | Widemann et al., 2009 (15)                                   |
| Vinorelbine                     | Selleckchem        | 15              | 100               | 10                           | 20                                         | 1079.11    | Rahmani et al., 1987 (16)                                    |
| Eribulin                        | Sequoia            | 40              | 519               | n/a                          | 519                                        | 826.00     | Mukohara et al., 2012 (17)                                   |
| <b>TKI's</b>                    |                    |                 |                   |                              |                                            |            |                                                              |
| Cabozantinib                    | Selleckchem        | 91              | 2000              | n/a                          | 2000                                       | 501.51     | Kurzrock et al., 2011 (18)                                   |
| Bosutinib                       | Selleckchem        | 24              | 200               | n/a                          | 200                                        | 530.45     | Rassi & Khoury, 2013 (19)                                    |
| Ponatinib                       | Selleckchem        | 24              | 73                | n/a                          | 73                                         | 532.56     | Narasimhan et al., 2013 (20)                                 |
| Lapatinib                       | Selleckchem        | 3               | 5000              | 1000                         | 5000                                       | 925.46     | Fouladi et al., 2010 (21)                                    |
| Crizotinib                      | Sequoia            | 42              | 630               | 420                          | 630                                        | 450.34     | Mosse et al., 2013 (22)                                      |
| Gefitinib                       | Selleckchem        | 12              | 2210              | 1000                         | 2210                                       | 446.90     | Daw et al., 2005 (23)                                        |
| MEK162                          | Selleckchem        | 3.6             | 493               | n/a                          | 493                                        | 441.23     | Finn et al., 2012 (24)                                       |
| Selumetinib                     | Selleckchem        | 6.1             | 781               | n/a                          | 781                                        | 457.68     | Adjei et al., 2008 (25)                                      |
| BKM120                          | Sequoia            | 24              | 969               | n/a                          | 969                                        | 410.39     | Bendell et al., 2012 (26)                                    |
| Vemurafenib                     | Selleckchem        | 57              | 31000             | n/a                          | 31000                                      | 489.92     | Bautista et al., 2014 (27)                                   |
| Dasatinib                       | Selleckchem        | 2.7             | 146               | n/a                          | 146                                        | 488.01     | Aplenc et al., 2011 (28)                                     |
| Saracatinib                     | Selleckchem        | 39              | 300               | 100                          | 300                                        | 542.03     | Baselga et al., 2010 (29)                                    |
| Axitinib                        | Selleckchem        | 4               | 27.8              | n/a                          | 27.8                                       | 386.47     | Martin et al., 2012 (30)                                     |
| Pazopanib                       | Sequoia            | 31              | 15000             | 7000                         | 15000                                      | 473.98     | Hurwitz et al., 2009 (31)                                    |
| Vandetanib                      | Selleckchem        | 300             | 264               | 748                          | 748                                        | 475.35     | Broniscer et al., 2010 (32)                                  |
| Regorafenib                     | Selleckchem        | 28              | 3900              | n/a                          | 3900                                       | 500.83     | Strumberg et al., 2012 (33)                                  |
| Sorafenib                       | Sequoia            | 30              | 3400              | n/a                          | 3400                                       | 637.03     | Widemann et al., 2012 (34)                                   |
| Dinacilib                       | Sequoia            | 2               | 700               | 10                           | 700                                        | 396.49     | J. J. Nemunaitis et al., 2013 (35)                           |
| MK1775                          | Sequoia            | 2               | 500               | n/a                          | 500                                        | 500.60     | Schellens et al., 2009 (36)                                  |
| <b>Topoisomerase inhibitors</b> |                    |                 |                   |                              |                                            |            |                                                              |
| Topotecan                       | Sequoia            | 3               | 2                 | 1                            | 2                                          | 457.91     | Daw et al., 2004 (37)                                        |
| SN-38                           | Sequoia            | 11              | 5                 | n/a                          | 5                                          | 392.40     | Furman et al., 2006 (38)                                     |
| Etoposide                       | Selleckchem        | 7               | 5000              | n/a                          | 5000                                       | 588.56     | Sinkule et al., 1984 (39)                                    |
| Doxorubicin                     | Selleckchem        | 20              | 40                | n/a                          | 40                                         | 543.52     | Ackland et al., 1989 (40)                                    |
| <b>Nucleoside analogues</b>     |                    |                 |                   |                              |                                            |            |                                                              |
| Cytarabine                      | Selleckchem        | 2.5             | 243.2             | n/a                          | 243.2                                      | 243.22     | Avramis et al., 1987 (41)                                    |
| Gemcitabine                     | Selleckchem        | 10              | 41000             | 3000                         | 41000                                      | 299.66     | Reid et al., 2004 (42)                                       |
| <b>mTOR inhibitors</b>          |                    |                 |                   |                              |                                            |            |                                                              |
| Everolimus                      | Selleckchem        | 30              | 11                | n/a                          | 11                                         | 958.22     | Fouladi et al., 2007 (43)                                    |
| Temsirolimus                    | Sequoia            | 31              | 800               | 100                          | 400                                        | 1030.29    | Spunt et al., 2011 (44)                                      |
| BEZ235                          | Selleckchem        | 3.5-13.5        | 2500              | 1700                         | 47                                         | 469.54     | Arkenau et al., 2012 (45)                                    |
| <b>Other</b>                    |                    |                 |                   |                              |                                            |            |                                                              |
| Arsenic Trioxide                | Sigma              | 3               | 1200              | 100                          | 200                                        | 197.84     | Shen et al., 1997 (46)                                       |
| Pomalidomide                    | Sequoia            | 7.5             | 75                | n/a                          | 75                                         | 273.24     | Li et al., 2015 (47)                                         |
| Zoledronic acid                 | Selleckchem        | 12              | 167               | n/a                          | 167                                        | 272.09     | Russell et al., 2011 (48)                                    |
| Plerixafor                      | Sequoia            | 4.6             | 926               | 200                          | 926                                        | 830.50     | Stewart et al., 2009 (49)                                    |
| 17-AAG                          | Selleckchem        | 3               | 5300              | n/a                          | 5300                                       | 585.69     | Weigel et al., 2007 (50)                                     |
| Omacetaxine                     | Santa Cruz Biotech | 6               | 100               | n/a                          | 100                                        | 545.62     | J. Nemunaitis et al., 2013 (51)                              |
| Carfilzomib                     | Sequoia            | 1               | 4232              | 1                            | 4232                                       | 719.91     | Papadopoulos et al., 2013 (52)                               |
| Bortezomib                      | Sequoia            | 12              | 63                | 5                            | 63                                         | 384.24     | Moreau et al., 2012; Muscal et al., 2013 (12, 53)            |
| Vismodegib                      | Selleckchem        | 96              | 4382              | 8215                         | 8215                                       | 421.30     | Gajjar et al., 2013 (54)                                     |
| Azacitidine                     | Selleckchem        | 4               | 750               | n/a                          | 750                                        | 244.20     | van Groeningen et al., 1986 (55)                             |

**Supplemental Table S1.** Sources and pharmacokinetic properties of the 54 chemotherapy agents screened at clinically achievable concentrations using osteosarcoma cell lines

## Supplemental Table S1 References

1. Camacho LH, Chawla SP, Chua V, Abbadessa G, Komarnitsky PB, Lewis J. A phase I study of palifosfamide in combination with doxorubicin: Safety and preliminary efficacy. *ASCO Meeting Abstracts*. 2009;27(15S):10577.
2. Veal GJ, Dias C, Price L, Parry A, Errington J, Hale J, et al. Influence of cellular factors and pharmacokinetics on the formation of platinum-DNA adducts in leukocytes of children receiving cisplatin therapy. *Clin Cancer Res*. 2001;7(8):2205-12. Epub 2001/08/08. PubMed PMID: 11489793.
3. Horton TM, Thompson PA, Berg SL, Adamson PC, Ingle AM, Dolan ME, et al. Phase I pharmacokinetic and pharmacodynamic study of temozolomide in pediatric patients with refractory or recurrent leukemia: a Children's Oncology Group Study. *J Clin Oncol*. 2007;25(31):4922-8. Epub 2007/11/01. doi: 10.1200/jco.2007.12.0667. PubMed PMID: 17971589.
4. Ganjoo KN, Cranmer LD, Butrynski JE, Rushing D, Adkins D, Okuno SH, et al. A phase I study of the safety and pharmacokinetics of the hypoxia-activated prodrug TH-302 in combination with doxorubicin in patients with advanced soft tissue sarcoma. *Oncology*. 2011;80(1-2):50-6. Epub 2011/06/01. doi: 10.1159/000327739. PubMed PMID: 21625179.
5. Brendel E, Ludwig M, Lathia C, Robert C, Ropert S, Soria JC, et al. Pharmacokinetic results of a phase I trial of sorafenib in combination with dacarbazine in patients with advanced solid tumors. *Cancer Chemother Pharmacol*. 2011;68(1):53-61. doi: 10.1007/s00280-010-1423-9. PubMed PMID: 20821331; PubMed Central PMCID: PMC3123694.
6. Krug LM, Ng KK, Kris MG, Miller VA, Tong W, Heelan RT, et al. Phase I and pharmacokinetic study of 10-propargyl-10-deazaaminopterin, a new antifolate. *Clin Cancer Res*. 2000;6(9):3493-8. Epub 2000/09/22. PubMed PMID: 10999734.
7. Malempati S, Nicholson HS, Reid JM, Blaney SM, Ingle AM, Krailo M, et al. Phase I trial and pharmacokinetic study of pemetrexed in children with refractory solid tumors: the Children's Oncology Group. *J Clin Oncol*. 2007;25(12):1505-11. Epub 2007/04/20. doi: 10.1200/jco.2006.09.1694. PubMed PMID: 17442992.
8. Zelcer S, Kellick M, Wexler LH, Gorlick R, Meyers PA. The Memorial Sloan Kettering Cancer Center experience with outpatient administration of high dose methotrexate with leucovorin rescue. *Pediatr Blood Cancer*. 2008;50(6):1176-80. Epub 2008/02/13. doi: 10.1002/pbc.21419. PubMed PMID: 18266225.
9. Slingerland M, Hess D, Clive S, Sharma S, Sandstrom P, Loman N, et al. A phase I, open-label, multicenter study to evaluate the pharmacokinetics and safety of oral panobinostat in patients with advanced solid tumors and various degrees of hepatic function. *Cancer Chemother Pharmacol*. 2014;74(5):1089-98. Epub 2014/09/26. doi: 10.1007/s00280-014-2594-6. PubMed PMID: 25253045.
10. Fouladi M, Furman WL, Chin T, Freeman BB, 3rd, Dudkin L, Stewart CF, et al. Phase I study of depsipeptide in pediatric patients with refractory solid tumors: a Children's Oncology Group report. *J Clin Oncol*. 2006;24(22):3678-85. Epub 2006/08/01. doi: 10.1200/jco.2006.06.4964. PubMed PMID: 16877737.
11. Amiri-Kordestani L, Luchenko V, Peer CJ, Ghafourian K, Reynolds J, Draper D, et al. Phase I trial of a new schedule of romidepsin in patients with advanced cancers. *Clin Cancer Res*. 2013;19(16):4499-507. Epub 2013/06/13. doi: 10.1158/1078-0432.ccr-13-0095. PubMed PMID: 23757352; PubMed Central PMCID: PMC3967244.
12. Muscal JA, Thompson PA, Horton TM, Ingle AM, Ahern CH, McGovern RM, et al. A phase I trial of vorinostat and bortezomib in children with refractory or recurrent solid tumors: a Children's Oncology Group phase I consortium study (ADVL0916). *Pediatr Blood Cancer*. 2013;60(3):390-5. Epub 2012/08/14. doi: 10.1002/pbc.24271. PubMed PMID: 22887890; PubMed Central PMCID: PMC3511610.
13. Chung V, Heath EI, Schelman WR, Johnson BM, Kirby LC, Lynch KM, et al. First-time-in-human study of GSK923295, a novel antimitotic inhibitor of centromere-associated protein E (CENP-E), in patients with refractory cancer. *Cancer Chemother Pharmacol*. 2012;69(3):733-41. Epub 2011/10/25. doi: 10.1007/s00280-011-1756-z. PubMed PMID: 22020315.
14. Extra JM, Rousseau F, Bruno R, Clavel M, Le Bail N, Marty M. Phase I and pharmacokinetic study of Taxotere (RP 56976; NSC 628503) given as a short intravenous infusion. *Cancer Res*. 1993;53(5):1037-42. Epub 1993/03/01. PubMed PMID: 8094996.
15. Widemann BC, Goodspeed W, Goodwin A, Fojo T, Balis FM, Fox E. Phase I trial and pharmacokinetic study of ixabepilone administered daily for 5 days in children and adolescents with refractory solid tumors. *J Clin Oncol*. 2009;27(4):550-6. Epub 2008/12/17. doi: 10.1200/jco.2008.17.6644. PubMed PMID: 19075272; PubMed Central PMCID: PMC2645861.
16. Rahmani R, Bruno R, Iliadis A, Favre R, Just S, Barbet J, et al. Clinical pharmacokinetics of the antitumor drug navelbine (5'-noranhydrovinblastine). *Cancer Res*. 1987;47(21):5796-9. Epub 1987/11/01. PubMed PMID: 3664483.
17. Mukohara T, Nagai S, Mukai H, Namiki M, Minami H. Eribulin mesylate in patients with refractory cancers: a Phase I study. *Invest New Drugs*. 2012;30(5):1926-33. Epub 2011/09/03. doi: 10.1007/s10637-011-9741-2. PubMed PMID: 21887501; PubMed Central PMCID: PMC3432792.
18. Kurzrock R, Sherman SI, Ball DW, Forastiere AA, Cohen RB, Mehra R, et al. Activity of XL184 (Cabozantinib), an oral tyrosine kinase inhibitor, in patients with medullary thyroid cancer. *J Clin Oncol*. 2011;29(19):2660-6. Epub 2011/05/25. doi: 10.1200/jco.2010.32.4145. PubMed PMID: 21606412; PubMed Central PMCID: PMC3646303.
19. Rassi FE, Houry HJ. Bosutinib: a SRC-ABL tyrosine kinase inhibitor for treatment of chronic myeloid leukemia. *Pharmgenomics Pers Med*. 2013;6:57-62. Epub 2013/09/11. doi: 10.2147/pgpm.s32145. PubMed PMID: 24019749; PubMed Central PMCID: PMC3760444.
20. Narasimhan NI, Dorer DJ, Niland K, Haluska F, Sonnichsen D. Effects of food on the pharmacokinetics of ponatinib in healthy subjects. *J Clin Pharm Ther*. 2013;38(6):440-4. Epub 2013/07/31. doi: 10.1111/jcpt.12082. PubMed PMID: 23888935; PubMed Central PMCID: PMC34286001.
21. Fouladi M, Stewart CF, Blaney SM, Onar-Thomas A, Schaiquevich P, Packer RJ, et al. Phase I trial of lapatinib in children with refractory CNS malignancies: a Pediatric Brain Tumor Consortium study. *J Clin Oncol*. 2010;28(27):4221-7. Epub 2010/08/18. doi: 10.1200/jco.2010.28.4687. PubMed PMID: 20713864; PubMed Central PMCID: PMC2953974.
22. Mosse YP, Lim MS, Voss SD, Wilner K, Ruffner K, Laliberte J, et al. Safety and activity of crizotinib for paediatric patients with refractory solid tumours or anaplastic large-cell lymphoma: a Children's Oncology Group phase 1 consortium study. *Lancet Oncol*.

- 2013;14(6):472-80. Epub 2013/04/20. doi: 10.1016/s1470-2045(13)70095-0. PubMed PMID: 23598171; PubMed Central PMCID: PMC3730818.
23. Daw NC, Furman WL, Stewart CF, Iacono LC, Krailo M, Bernstein ML, et al. Phase I and pharmacokinetic study of gefitinib in children with refractory solid tumors: a Children's Oncology Group Study. *J Clin Oncol.* 2005;23(25):6172-80. Epub 2005/09/02. doi: 10.1200/jco.2005.11.429. PubMed PMID: 16135484.
24. Finn RS, Javle MM, Tan BR, Weekes CD, Bendell JC, Patnaik A, et al. A phase I study of MEK inhibitor MEK162 (ARRY-438162) in patients with biliary tract cancer. *ASCO Meeting Abstracts.* 2012;30(4\_suppl):220.
25. Adjei AA, Cohen RB, Franklin W, Morris C, Wilson D, Molina JR, et al. Phase I pharmacokinetic and pharmacodynamic study of the oral, small-molecule mitogen-activated protein kinase kinase 1/2 inhibitor AZD6244 (ARRY-142886) in patients with advanced cancers. *J Clin Oncol.* 2008;26(13):2139-46. Epub 2008/04/09. doi: 10.1200/jco.2007.14.4956. PubMed PMID: 18390968; PubMed Central PMCID: PMC32718422.
26. Bendell JC, Rodon J, Burris HA, de Jonge M, Verweij J, Birle D, et al. Phase I, dose-escalation study of BKM120, an oral pan-Class I PI3K inhibitor, in patients with advanced solid tumors. *J Clin Oncol.* 2012;30(3):282-90. Epub 2011/12/14. doi: 10.1200/jco.2011.36.1360. PubMed PMID: 22162589.
27. Bautista F, Paci A, Minard-Colin V, Dufour C, Grill J, Lacroix L, et al. Vemurafenib in pediatric patients with BRAFV600E mutated high-grade gliomas. *Pediatr Blood Cancer.* 2014;61(6):1101-3. Epub 2014/01/01. doi: 10.1002/pbc.24891. PubMed PMID: 24375920.
28. Aplenc R, Blaney SM, Strauss LC, Balis FM, Shusterman S, Ingle AM, et al. Pediatric phase I trial and pharmacokinetic study of dasatinib: a report from the children's oncology group phase I consortium. *J Clin Oncol.* 2011;29(7):839-44. Epub 2011/01/26. doi: 10.1200/jco.2010.30.7231. PubMed PMID: 21263099; PubMed Central PMCID: PMC3068059.
29. Baselga J, Cervantes A, Martinelli E, Chirivella I, Hoekman K, Hurwitz HI, et al. Phase I safety, pharmacokinetics, and inhibition of SRC activity study of saracatinib in patients with solid tumors. *Clin Cancer Res.* 2010;16(19):4876-83. Epub 2010/09/02. doi: 10.1158/1078-0432.ccr-10-0748. PubMed PMID: 20805299.
30. Martin LP, Kozloff MF, Herbst RS, Samuel TA, Kim S, Rosbrook B, et al. Phase I study of axitinib combined with paclitaxel, docetaxel or capecitabine in patients with advanced solid tumours. *Br J Cancer.* 2012;107(8):1268-76. Epub 2012/09/22. doi: 10.1038/bjc.2012.407. PubMed PMID: 22996612; PubMed Central PMCID: PMC3494424.
31. Hurwitz HI, Dowlati A, Saini S, Savage S, Suttle AB, Gibson DM, et al. Phase I trial of pazopanib in patients with advanced cancer. *Clin Cancer Res.* 2009;15(12):4220-7. Epub 2009/06/11. doi: 10.1158/1078-0432.ccr-08-2740. PubMed PMID: 19509175.
32. Broniscer A, Baker JN, Tagen M, Onar-Thomas A, Gilbertson RJ, Davidoff AM, et al. Phase I study of vandetanib during and after radiotherapy in children with diffuse intrinsic pontine glioma. *J Clin Oncol.* 2010;28(31):4762-8. Epub 2010/10/06. doi: 10.1200/jco.2010.30.3545. PubMed PMID: 20921456; PubMed Central PMCID: PMC3020706.
33. Strumberg D, Scheulen ME, Schultheis B, Richly H, Frost A, Buchert M, et al. Regorafenib (BAY 73-4506) in advanced colorectal cancer: a phase I study. *Br J Cancer.* 2012;106(11):1722-7. Epub 2012/05/10. doi: 10.1038/bjc.2012.153. PubMed PMID: 22568966; PubMed Central PMCID: PMC3364125.
34. Widemann BC, Kim A, Fox E, Baruchel S, Adamson PC, Ingle AM, et al. A phase I trial and pharmacokinetic study of sorafenib in children with refractory solid tumors or leukemias: a Children's Oncology Group Phase I Consortium report. *Clin Cancer Res.* 2012;18(21):6011-22. Epub 2012/09/11. doi: 10.1158/1078-0432.ccr-11-3284. PubMed PMID: 22962440; PubMed Central PMCID: PMC34008314.
35. Nemunaitis JJ, Small KA, Kirschmeier P, Zhang D, Zhu Y, Jou YM, et al. A first-in-human, phase 1, dose-escalation study of dinaciclib, a novel cyclin-dependent kinase inhibitor, administered weekly in subjects with advanced malignancies. *J Transl Med.* 2013;11:259. Epub 2013/10/18. doi: 10.1186/1479-5876-11-259. PubMed PMID: 24131779; PubMed Central PMCID: PMC3853718.
36. Schellens JH, Leijen S, Shapiro GI, Pavlick AC, Tibes R, O'Day SJ, et al. A phase I and pharmacological study of MK-1775, a Wee1 tyrosine kinase inhibitor, in both monotherapy and in combination with gemcitabine, cisplatin, or carboplatin in patients with advanced solid tumors. *ASCO Meeting Abstracts.* 2009;27(15S):3510.
37. Daw NC, Santana VM, Iacono LC, Furman WL, Hawkins DR, Houghton PJ, et al. Phase I and pharmacokinetic study of topotecan administered orally once daily for 5 days for 2 consecutive weeks to pediatric patients with refractory solid tumors. *J Clin Oncol.* 2004;22(5):829-37. Epub 2004/03/03. doi: 10.1200/jco.2004.07.110. PubMed PMID: 14990638.
38. Furman WL, Crews KR, Billups C, Wu J, Gajjar AJ, Daw NC, et al. Cefixime allows greater dose escalation of oral irinotecan: a phase I study in pediatric patients with refractory solid tumors. *J Clin Oncol.* 2006;24(4):563-70. Epub 2006/02/01. doi: 10.1200/jco.2005.03.2847. PubMed PMID: 16446328.
39. Sinkule JA, Hutson P, Hayes FA, Etcubanas E, Evans W. Pharmacokinetics of etoposide (VP16) in children and adolescents with refractory solid tumors. *Cancer Res.* 1984;44(7):3109-13. Epub 1984/07/01. PubMed PMID: 6539169.
40. Ackland SP, Ratain MJ, Vogelzang NJ, Choi KE, Ruane M, Sinkule JA. Pharmacokinetics and pharmacodynamics of long-term continuous-infusion doxorubicin. *Clin Pharmacol Ther.* 1989;45(4):340-7. Epub 1989/04/01. PubMed PMID: 2702792.
41. Avramis VI, Biener R, Krailo M, Finklestein J, Ettinger L, Willoughby M, et al. Biochemical pharmacology of high dose 1-beta-D-arabinofuranosylcytosine in childhood acute leukemia. *Cancer Res.* 1987;47(24 Pt 1):6786-92. Epub 1987/12/15. PubMed PMID: 3479250.
42. Reid JM, Qu W, Safgren SL, Ames MM, Krailo MD, Seibel NL, et al. Phase I trial and pharmacokinetics of gemcitabine in children with advanced solid tumors. *J Clin Oncol.* 2004;22(12):2445-51. Epub 2004/06/16. doi: 10.1200/jco.2004.10.142. PubMed PMID: 15197207.
43. Fouladi M, Laningham F, Wu J, O'Shaughnessy MA, Molina K, Broniscer A, et al. Phase I study of everolimus in pediatric patients with refractory solid tumors. *J Clin Oncol.* 2007;25(30):4806-12. Epub 2007/10/20. doi: 10.1200/jco.2007.11.4017. PubMed PMID: 17947729.
44. Spunt SL, Grupp SA, Vik TA, Santana VM, Greenblatt DJ, Clancy J, et al. Phase I study of temsirolimus in pediatric patients with recurrent/refractory solid tumors. *J Clin Oncol.* 2011;29(21):2933-40. Epub 2011/06/22. doi: 10.1200/jco.2010.33.4649. PubMed PMID: 21690471; PubMed Central PMCID: PMC3138720.

45. Arkenau H-T, Jones SF, Kurkjian C, Infante JR, Pant S, Burris HA, et al. The PI3K/mTOR inhibitor BEZ235 given twice daily for the treatment of patients (pts) with advanced solid tumors. ASCO Meeting Abstracts. 2012;30(15\_suppl):3097.
46. Shen ZX, Chen GQ, Ni JH, Li XS, Xiong SM, Qiu QY, et al. Use of arsenic trioxide (As<sub>2</sub>O<sub>3</sub>) in the treatment of acute promyelocytic leukemia (APL): II. Clinical efficacy and pharmacokinetics in relapsed patients. *Blood*. 1997;89(9):3354-60. Epub 1997/05/01. PubMed PMID: 9129042.
47. Li Y, Xu Y, Liu L, Wang X, Palmisano M, Zhou S. Population pharmacokinetics of pomalidomide. *J Clin Pharmacol*. 2015. Epub 2015/01/06. doi: 10.1002/jcph.455. PubMed PMID: 25556560.
48. Russell HV, Groshen SG, Ara T, DeClerck YA, Hawkins R, Jackson HA, et al. A phase I study of zoledronic acid and low-dose cyclophosphamide in recurrent/refractory neuroblastoma: a new approaches to neuroblastoma therapy (NANT) study. *Pediatr Blood Cancer*. 2011;57(2):275-82. doi: 10.1002/pbc.22821. PubMed PMID: 21671363; PubMed Central PMCID: PMC3117015.
49. Stewart DA, Smith C, MacFarland R, Calandra G. Pharmacokinetics and pharmacodynamics of plerixafor in patients with non-Hodgkin lymphoma and multiple myeloma. *Biol Blood Marrow Transplant*. 2009;15(1):39-46. Epub 2009/01/13. doi: 10.1016/j.bbmt.2008.10.018. PubMed PMID: 19135941.
50. Weigel BJ, Blaney SM, Reid JM, Safgren SL, Bagatell R, Kersey J, et al. A phase I study of 17-allylaminogeldanamycin in relapsed/refractory pediatric patients with solid tumors: a Children's Oncology Group study. *Clin Cancer Res*. 2007;13(6):1789-93. Epub 2007/03/17. doi: 10.1158/1078-0432.ccr-06-2270. PubMed PMID: 17363534.
51. Nemunaitis J, Mita A, Stephenson J, Mita MM, Sarantopoulos J, Padmanabhan-Iyer S, et al. Pharmacokinetic study of omacetaxine mepesuccinate administered subcutaneously to patients with advanced solid and hematologic tumors. *Cancer Chemother Pharmacol*. 2013;71(1):35-41. Epub 2012/10/12. doi: 10.1007/s00280-012-1963-2. PubMed PMID: 23053254; PubMed Central PMCID: PMC3535355.
52. Papadopoulos KP, Burris HA, 3rd, Gordon M, Lee P, Sausville EA, Rosen PJ, et al. A phase I/II study of carfilzomib 2-10-min infusion in patients with advanced solid tumors. *Cancer Chemother Pharmacol*. 2013;72(4):861-8. Epub 2013/08/27. doi: 10.1007/s00280-013-2267-x. PubMed PMID: 23975329; PubMed Central PMCID: PMC3784064.
53. Moreau P, Karamanesht, II, Domnikova N, Kyselyova MY, Vilchevska KV, Doronin VA, et al. Pharmacokinetic, pharmacodynamic and covariate analysis of subcutaneous versus intravenous administration of bortezomib in patients with relapsed multiple myeloma. *Clin Pharmacokinet*. 2012;51(12):823-9. Epub 2012/09/29. doi: 10.1007/s40262-012-0010-0. PubMed PMID: 23018466.
54. Gajjar A, Stewart CF, Ellison DW, Kaste S, Kun LE, Packer RJ, et al. Phase I study of vismodegib in children with recurrent or refractory medulloblastoma: a pediatric brain tumor consortium study. *Clin Cancer Res*. 2013;19(22):6305-12. Epub 2013/10/01. doi: 10.1158/1078-0432.ccr-13-1425. PubMed PMID: 24077351; PubMed Central PMCID: PMC3856244.
55. van Groeningen CJ, Leyva A, O'Brien AM, Gall HE, Pinedo HM. Phase I and pharmacokinetic study of 5-aza-2'-deoxycytidine (NSC 127716) in cancer patients. *Cancer Res*. 1986;46(9):4831-6. Epub 1986/09/01. PubMed PMID: 2425959.

**Combinations that Produce FA Values of At Least 0.85 in All 5 Osteosarcoma Cell Lines**

| Agent 1            |                                    | Agent 2             |                     | Conc Index |       | U2OS  |       | SAOS2 |       | 143B  |        | MNNG  |       | MG63  |        | Average |       |
|--------------------|------------------------------------|---------------------|---------------------|------------|-------|-------|-------|-------|-------|-------|--------|-------|-------|-------|--------|---------|-------|
| Tx1                | Mechanism                          | Tx2                 | Mechanism           | Tx1        | Tx2   | Fa    | Cl    | Fa    | Cl    | Fa    | Cl     | Fa    | Cl    | Fa    | Cl     | Fa      | Cl    |
| <b>Bortezomib</b>  | <i>Proteasome</i>                  | <b>Carfilzomib</b>  | <i>Proteasome</i>   | 3          | 5     | 0.966 | 0.659 | 0.955 | 0.732 | 0.999 | 1.020  | 0.986 | 0.559 | 0.997 | 0.484  | 0.981   | 0.691 |
|                    |                                    |                     |                     | 4          | 5     | 0.975 | 0.700 | 0.975 | 0.609 | 0.999 | 1.210  | 0.992 | 0.551 | 0.997 | 0.554  | 0.988   | 0.725 |
|                    |                                    |                     |                     | 5          | 4     | 0.959 | 0.824 | 0.904 | 0.696 | 0.999 | 1.110  | 0.989 | 0.606 | 0.991 | 0.737  | 0.969   | 0.795 |
|                    |                                    |                     |                     | 5          | 5     | 0.988 | 0.666 | 0.989 | 0.461 | 0.999 | 1.480  | 0.996 | 0.550 | 0.997 | 0.669  | 0.994   | 0.765 |
|                    |                                    | <b>GSK923295A</b>   | <i>Cell Cycle</i>   | 5          | 1     | 0.863 | 0.942 | 0.854 | 2.240 | 0.968 | 1.580  | 0.947 | 0.927 | 0.980 | 0.692  | 0.922   | 1.276 |
|                    |                                    | <b>Ixabepilone</b>  | <i>Microtubules</i> | 5          | 4     | 0.868 | 1.240 | 0.870 | 0.520 | 0.983 | 1.430  | 0.975 | 0.601 | 0.937 | 0.952  | 0.927   | 0.949 |
|                    |                                    |                     |                     | 5          | 5     | 0.853 | 1.710 | 0.870 | 0.693 | 0.986 | 1.390  | 0.977 | 0.595 | 0.943 | 0.935  | 0.926   | 1.065 |
|                    |                                    | <b>MK1775</b>       | <i>Cell Cycle</i>   | 3          | 5     | 0.929 | 0.763 | 0.914 | 0.851 | 0.997 | 1.060  | 0.980 | 0.765 | 0.880 | 1.010  | 0.940   | 0.890 |
|                    |                                    |                     |                     | 4          | 5     | 0.968 | 0.638 | 0.922 | 0.831 | 0.998 | 1.110  | 0.988 | 0.731 | 0.935 | 0.898  | 0.962   | 0.842 |
|                    |                                    |                     |                     | 5          | 5     | 0.985 | 0.594 | 0.923 | 0.890 | 0.999 | 1.330  | 0.995 | 0.645 | 0.981 | 0.709  | 0.977   | 0.834 |
|                    |                                    | <b>Panobinostat</b> | <i>HDAC</i>         | 4          | 5     | 1.000 | 0.100 | 0.942 | 0.441 | 1.000 | 0.472  | 0.984 | 0.391 | 0.998 | 0.267  | 0.985   | 0.334 |
|                    |                                    |                     |                     | 5          | 3     | 0.999 | 0.205 | 0.910 | 0.371 | 1.000 | 0.663  | 0.981 | 0.551 | 0.995 | 0.446  | 0.977   | 0.447 |
|                    |                                    |                     |                     | 5          | 4     | 1.000 | 0.178 | 0.964 | 0.246 | 1.000 | 0.437  | 0.991 | 0.452 | 0.997 | 0.381  | 0.991   | 0.339 |
|                    |                                    |                     |                     | 5          | 5     | 0.999 | 0.226 | 0.991 | 0.132 | 1.000 | 0.551  | 0.997 | 0.363 | 0.999 | 0.309  | 0.997   | 0.316 |
|                    |                                    | <b>Regorafenib</b>  | <i>RTK/GF</i>       | 5          | 5     | 0.999 | 0.329 | 0.938 | 0.920 | 1.000 | 0.772  | 0.989 | 0.670 | 0.920 | 1.260  | 0.969   | 0.790 |
|                    |                                    | <b>Romidepsin</b>   | <i>HDAC</i>         | 1          | 5     | 0.997 | 0.109 | 0.894 | 0.890 | 0.998 | 0.316  | 0.871 | 0.594 | 0.962 | 0.434  | 0.944   | 0.469 |
|                    |                                    |                     |                     | 2          | 5     | 0.999 | 0.096 | 0.898 | 0.899 | 1.000 | 0.301  | 0.953 | 0.362 | 0.996 | 0.185  | 0.969   | 0.369 |
|                    |                                    |                     |                     | 3          | 5     | 0.999 | 0.121 | 0.935 | 0.662 | 1.000 | 0.357  | 0.990 | 0.267 | 0.998 | 0.203  | 0.984   | 0.322 |
|                    |                                    |                     |                     | 4          | 5     | 0.999 | 0.145 | 0.984 | 0.257 | 1.000 | 0.455  | 0.998 | 0.248 | 0.998 | 0.247  | 0.996   | 0.270 |
|                    |                                    |                     |                     | 5          | 4     | 0.999 | 0.225 | 0.935 | 0.486 | 1.000 | 0.718  | 0.999 | 0.278 | 0.998 | 0.348  | 0.986   | 0.411 |
| 5                  | 5                                  | 1.000               | 0.178               | 0.997      | 0.093 | 1.000 | 0.650 | 0.999 | 0.268 | 0.998 | 0.319  | 0.999 | 0.302 |       |        |         |       |
| <b>Carfilzomib</b> | <i>Proteasome</i>                  | <b>Panobinostat</b> | <i>HDAC</i>         | 5          | 3     | 0.920 | 0.497 | 0.996 | 0.284 | 0.999 | 0.539  | 0.896 | 0.707 | 0.989 | 0.465  | 0.960   | 0.498 |
|                    |                                    |                     |                     | 5          | 4     | 0.987 | 0.217 | 1.000 | 0.114 | 0.999 | 0.452  | 0.946 | 0.517 | 0.997 | 0.273  | 0.986   | 0.315 |
|                    |                                    |                     |                     | 5          | 5     | 0.998 | 0.088 | 1.000 | 0.140 | 1.000 | 0.269  | 0.971 | 0.394 | 0.999 | 0.209  | 0.993   | 0.220 |
|                    |                                    | <b>Regorafenib</b>  | <i>RTK/GF</i>       | 5          | 4     | 0.992 | 0.356 | 0.879 | 1.430 | 0.999 | 0.606  | 0.956 | 0.670 | 0.994 | 0.417  | 0.964   | 0.696 |
|                    |                                    |                     |                     | 5          | 5     | 1.000 | 0.146 | 0.996 | 0.424 | 1.000 | 0.408  | 0.990 | 0.433 | 0.892 | 1.460  | 0.976   | 0.574 |
| <b>Romidepsin</b>  | <i>HDAC</i>                        | 4                   | 5                   | 0.994      | 0.103 | 0.957 | 0.716 | 1.000 | 0.158 | 0.954 | 0.319  | 0.996 | 0.167 | 0.980 | 0.293  |         |       |
|                    |                                    | 5                   | 2                   | 0.906      | 0.445 | 0.936 | 3.640 | 0.988 | 0.731 | 0.943 | 0.100  | 0.929 | 0.165 | 0.941 | 1.016  |         |       |
|                    |                                    | 5                   | 4                   | 0.993      | 0.179 | 0.984 | 0.551 | 1.000 | 0.333 | 0.994 | 0.196  | 0.998 | 0.228 | 0.994 | 0.297  |         |       |
| 5                  | 5                                  | 0.999               | 0.062               | 0.999      | 0.237 | 1.000 | 0.259 | 0.995 | 0.184 | 0.999 | 0.212  | 0.998 | 0.191 |       |        |         |       |
| <b>MK1775</b>      | <i>Cell Cycle (Wee1 Inhibitor)</i> | <b>Carfilzomib</b>  | <i>Proteasome</i>   | 5          | 4     | 0.872 | 0.836 | 0.926 | 1.010 | 0.997 | 0.803  | 0.983 | 0.579 | 0.943 | 0.619  | 0.944   | 0.769 |
|                    |                                    |                     |                     | 5          | 5     | 0.948 | 0.657 | 0.939 | 1.240 | 0.999 | 0.712  | 0.992 | 0.533 | 0.992 | 0.429  | 0.974   | 0.714 |
|                    |                                    | <b>Gemcitabine</b>  | <i>Nucleoside</i>   | 4          | 5     | 0.892 | 0.238 | 0.873 | 0.983 | 0.968 | 5.730  | 0.883 | 0.577 | 0.873 | 0.226  | 0.898   | 1.551 |
|                    |                                    |                     |                     | 5          | 4     | 0.911 | 0.408 | 0.926 | 0.691 | 0.980 | 2.980  | 0.902 | 1.040 | 0.874 | 0.411  | 0.919   | 1.106 |
|                    |                                    |                     |                     | 5          | 5     | 0.930 | 0.337 | 0.916 | 0.881 | 0.978 | 5.320  | 0.918 | 0.943 | 0.901 | 0.321  | 0.928   | 1.560 |
|                    |                                    | <b>Ixabepilone</b>  | <i>Microtubules</i> | 4          | 4     | 0.864 | 0.614 | 0.938 | 0.334 | 0.960 | 0.554  | 0.931 | 0.479 | 0.876 | 0.274  | 0.914   | 0.451 |
|                    |                                    |                     |                     | 4          | 5     | 0.871 | 0.872 | 0.940 | 0.387 | 0.969 | 0.510  | 0.928 | 0.545 | 0.880 | 0.336  | 0.918   | 0.530 |
|                    |                                    |                     |                     | 5          | 1     | 0.851 | 0.666 | 0.918 | 0.696 | 0.976 | 0.914  | 0.953 | 0.715 | 0.860 | 0.460  | 0.911   | 0.690 |
|                    |                                    |                     |                     | 5          | 2     | 0.870 | 0.625 | 0.927 | 0.642 | 0.975 | 0.928  | 0.956 | 0.694 | 0.867 | 0.447  | 0.919   | 0.667 |
|                    |                                    |                     |                     | 5          | 3     | 0.897 | 0.562 | 0.960 | 0.398 | 0.976 | 0.910  | 0.953 | 0.727 | 0.880 | 0.417  | 0.933   | 0.603 |
|                    |                                    | 5                   | 4                   | 0.898      | 0.655 | 0.961 | 0.412 | 0.983 | 0.811 | 0.952 | 0.746  | 0.888 | 0.412 | 0.936 | 0.607  |         |       |
|                    |                                    | 5                   | 5                   | 0.895      | 0.887 | 0.954 | 0.515 | 0.986 | 0.769 | 0.952 | 0.778  | 0.898 | 0.420 | 0.937 | 0.674  |         |       |
|                    |                                    | <b>Panobinostat</b> | <i>HDAC</i>         | 5          | 1     | 0.869 | 0.563 | 0.946 | 0.500 | 0.961 | 1.070  | 0.938 | 0.818 | 0.899 | 0.317  | 0.923   | 0.654 |
|                    |                                    |                     |                     | 5          | 2     | 0.894 | 0.486 | 0.945 | 0.526 | 0.958 | 1.110  | 0.930 | 0.868 | 0.902 | 0.310  | 0.926   | 0.660 |
|                    |                                    |                     |                     | 5          | 3     | 0.920 | 0.401 | 0.952 | 0.503 | 0.940 | 1.260  | 0.910 | 0.987 | 0.904 | 0.310  | 0.925   | 0.692 |
| 5                  | 4                                  | 0.945               | 0.313               | 0.931      | 0.757 | 0.910 | 1.470 | 0.866 | 1.230 | 0.897 | 0.347  | 0.910 | 0.823 |       |        |         |       |
| <b>Regorafenib</b> | <i>RTK/GF</i>                      | 5                   | 5                   | 0.985      | 0.593 | 0.928 | 1.390 | 0.996 | 0.735 | 0.927 | 1.410  | 0.892 | 0.634 | 0.946 | 0.952  |         |       |
| <b>Romidepsin</b>  | <i>HDAC</i>                        | 4                   | 4                   | 0.971      | 0.160 | 0.867 | 1.000 | 0.926 | 0.811 | 0.893 | 0.663  | 0.889 | 0.593 | 0.909 | 0.645  |         |       |
|                    |                                    | 4                   | 5                   | 0.980      | 0.158 | 0.948 | 0.697 | 0.945 | 0.819 | 0.902 | 0.735  | 0.922 | 0.630 | 0.939 | 0.608  |         |       |
|                    |                                    | 5                   | 1                   | 0.925      | 0.382 | 0.915 | 0.743 | 0.976 | 0.925 | 0.958 | 0.675  | 0.866 | 0.494 | 0.928 | 0.644  |         |       |
|                    |                                    | 5                   | 2                   | 0.949      | 0.300 | 0.920 | 0.746 | 0.974 | 0.950 | 0.947 | 0.762  | 0.862 | 0.583 | 0.931 | 0.668  |         |       |
|                    |                                    | 5                   | 3                   | 0.965      | 0.244 | 0.928 | 0.756 | 0.966 | 1.070 | 0.945 | 0.794  | 0.875 | 0.646 | 0.936 | 0.702  |         |       |
|                    |                                    | 5                   | 4                   | 0.973      | 0.235 | 0.955 | 0.627 | 0.971 | 1.040 | 0.941 | 0.851  | 0.888 | 0.775 | 0.945 | 0.706  |         |       |
| 5                  | 5                                  | 0.983               | 0.200               | 0.976      | 0.508 | 0.973 | 1.070 | 0.936 | 0.953 | 0.930 | 0.651  | 0.960 | 0.676 |       |        |         |       |
| <b>Romidepsin</b>  | <i>HDAC</i>                        | <b>Gemcitabine</b>  | <i>Nucleoside</i>   | 4          | 4     | 0.852 | 0.420 | 0.921 | 2.410 | 0.993 | 2.360  | 0.919 | 0.087 | 0.931 | 0.087  | 0.923   | 1.073 |
|                    |                                    |                     |                     | 4          | 5     | 0.854 | 0.413 | 0.930 | 2.340 | 0.994 | 4.330  | 0.919 | 0.095 | 0.895 | 0.215  | 0.918   | 1.479 |
|                    |                                    |                     |                     | 5          | 1     | 0.879 | 0.631 | 0.923 | 4.250 | 0.974 | 0.556  | 0.938 | 0.111 | 0.901 | 0.302  | 0.923   | 1.170 |
|                    |                                    |                     |                     | 5          | 3     | 0.919 | 0.369 | 0.950 | 3.000 | 0.993 | 1.160  | 0.942 | 0.104 | 0.933 | 0.152  | 0.947   | 0.957 |
|                    |                                    |                     |                     | 5          | 4     | 0.929 | 0.309 | 0.957 | 2.690 | 0.994 | 2.150  | 0.937 | 0.118 | 0.938 | 0.137  | 0.951   | 1.081 |
|                    |                                    | 5                   | 5                   | 0.926      | 0.324 | 0.967 | 2.210 | 0.992 | 4.770 | 0.939 | 0.118  | 0.909 | 0.287 | 0.947 | 1.542  |         |       |
|                    |                                    | <b>GSK923295A</b>   | <i>Cell Cycle</i>   | 5          | 3     | 0.917 | 0.379 | 0.972 | 2.210 | 0.879 | 0.427  | 0.851 | 2.260 | 0.851 | 16.400 | 0.894   | 4.335 |
| 5                  | 4                                  | 0.934               | 0.280               | 0.969      | 2.810 | 0.893 | 0.381 | 0.852 | 4.120 | 0.860 | 28.000 | 0.902 | 7.118 |       |        |         |       |
| 5                  | 5                                  | 0.949               | 0.203               | 0.966      | 3.950 | 0.906 | 0.341 | 0.856 | 7.540 | 0.899 | 27.200 | 0.915 | 7.847 |       |        |         |       |

**Supplemental Table S2.** FA and CI values of drug combinations tested across 5 osteosarcoma cell lines with FA>0.85. Tx1 and Tx2 indices indicate drug concentrations used in the combination as summarized in Supplemental Table S3.

| Concentrations of Agents in Combination that Produced FA Values of At Least 0.85 in All Five Osteosarcoma Cell Lines |              |                     |      |                                                          |       |       |       |      |       |      |       |      |       |
|----------------------------------------------------------------------------------------------------------------------|--------------|---------------------|------|----------------------------------------------------------|-------|-------|-------|------|-------|------|-------|------|-------|
| Agent Name                                                                                                           |              | Concentration Index |      | Concentration of Agent Used in a Given Cell Line (ng/ml) |       |       |       |      |       |      |       |      |       |
|                                                                                                                      |              |                     |      | U2OS                                                     |       | SAOS2 |       | 143B |       | MNNG |       | MG63 |       |
| Tx1                                                                                                                  | Tx2          | Tx1                 | Tx2  | Tx1                                                      | Tx2   | Tx1   | Tx2   | Tx1  | Tx2   | Tx1  | Tx2   | Tx1  | Tx2   |
| Bortezomib                                                                                                           | Carfilzomib  | 3                   | 5    | 6.59                                                     | 30    | 6.59  | 30    | 6.59 | 30    | 6.59 | 30    | 2.74 | 30    |
|                                                                                                                      |              | 4                   | 5    | 8.89                                                     | 30    | 8.89  | 30    | 8.89 | 30    | 8.89 | 30    | 3.7  | 30    |
|                                                                                                                      |              | 5                   | 4    | 12                                                       | 15    | 12    | 15    | 12   | 15    | 12   | 15    | 5    | 15    |
|                                                                                                                      |              | 5                   | 5    | 12                                                       | 30    | 12    | 30    | 12   | 30    | 12   | 30    | 5    | 30    |
|                                                                                                                      | GSK923295A   | 5                   | 1    | 12                                                       | 62.5  | 12    | 438   | 12   | 438   | 12   | 438   | 5    | 438   |
|                                                                                                                      | Ixabepilone  | 5                   | 4    | 12                                                       | 50    | 12    | 10    | 12   | 10    | 12   | 50    | 5    | 12.5  |
|                                                                                                                      |              | 5                   | 5    | 12                                                       | 100   | 12    | 20    | 12   | 20    | 12   | 100   | 5    | 25    |
|                                                                                                                      | MK1775       | 3                   | 5    | 6.59                                                     | 980   | 6.59  | 980   | 6.59 | 980   | 6.59 | 980   | 2.74 | 980   |
|                                                                                                                      |              | 4                   | 5    | 8.89                                                     | 980   | 8.89  | 980   | 8.89 | 980   | 8.89 | 980   | 3.7  | 980   |
|                                                                                                                      |              | 5                   | 5    | 12                                                       | 980   | 12    | 980   | 12   | 980   | 12   | 980   | 5    | 980   |
|                                                                                                                      | Panobinostat | 4                   | 5    | 8.89                                                     | 14    | 8.89  | 14    | 8.89 | 14    | 8.89 | 14    | 3.7  | 14    |
|                                                                                                                      |              | 5                   | 3    | 12                                                       | 3.5   | 12    | 3.5   | 12   | 3.5   | 12   | 3.5   | 5    | 3.5   |
|                                                                                                                      |              | 5                   | 4    | 12                                                       | 7     | 12    | 7     | 12   | 7     | 12   | 7     | 5    | 7     |
|                                                                                                                      |              | 5                   | 5    | 12                                                       | 14    | 12    | 14    | 12   | 14    | 12   | 14    | 5    | 14    |
|                                                                                                                      | Regorafenib  | 5                   | 5    | 12                                                       | 15000 | 12    | 15000 | 12   | 15000 | 12   | 15000 | 5    | 3900  |
|                                                                                                                      | Romidepsin   | 1                   | 5    | 3.61                                                     | 200   | 3.61  | 25    | 3.61 | 150   | 3.61 | 200   | 1.5  | 200   |
|                                                                                                                      |              | 2                   | 5    | 4.88                                                     | 200   | 4.88  | 25    | 4.88 | 150   | 4.88 | 200   | 2.03 | 200   |
|                                                                                                                      |              | 3                   | 5    | 6.59                                                     | 200   | 6.59  | 25    | 6.59 | 150   | 6.59 | 200   | 2.74 | 200   |
|                                                                                                                      |              | 4                   | 5    | 8.89                                                     | 200   | 8.89  | 25    | 8.89 | 150   | 8.89 | 200   | 3.7  | 200   |
|                                                                                                                      |              | 5                   | 4    | 12                                                       | 100   | 12    | 12.5  | 12   | 75    | 12   | 100   | 5    | 100   |
| 5                                                                                                                    |              | 5                   | 12   | 200                                                      | 12    | 25    | 12    | 150  | 12    | 200  | 5     | 200  |       |
| Carfilzomib                                                                                                          | Panobinostat | 5                   | 3    | 30                                                       | 3.5   | 30    | 3.5   | 30   | 3.5   | 30   | 3.5   | 30   | 3.5   |
|                                                                                                                      |              | 5                   | 4    | 30                                                       | 7     | 30    | 7     | 30   | 7     | 30   | 7     | 30   | 7     |
|                                                                                                                      |              | 5                   | 5    | 30                                                       | 14    | 30    | 14    | 30   | 14    | 30   | 14    | 30   | 14    |
|                                                                                                                      | Regorafenib  | 5                   | 4    | 30                                                       | 7500  | 30    | 7500  | 30   | 7500  | 30   | 7500  | 30   | 2890  |
|                                                                                                                      |              | 5                   | 5    | 30                                                       | 15000 | 30    | 15000 | 30   | 15000 | 30   | 15000 | 30   | 3900  |
|                                                                                                                      | Romidepsin   | 4                   | 5    | 15                                                       | 200   | 15    | 25    | 15   | 150   | 15   | 200   | 15   | 200   |
| 5                                                                                                                    |              | 2                   | 30   | 25                                                       | 30    | 3.13  | 30    | 18.8 | 30    | 25   | 30    | 25   |       |
| 5                                                                                                                    |              | 4                   | 30   | 100                                                      | 30    | 12.5  | 30    | 75   | 30    | 100  | 30    | 100  |       |
| 5                                                                                                                    |              | 5                   | 30   | 200                                                      | 30    | 25    | 30    | 150  | 30    | 200  | 30    | 200  |       |
| MK1775                                                                                                               | Carfilzomib  | 5                   | 4    | 980                                                      | 15    | 980   | 15    | 980  | 15    | 980  | 15    | 980  | 15    |
|                                                                                                                      |              | 5                   | 5    | 980                                                      | 30    | 980   | 30    | 980  | 30    | 980  | 30    | 980  | 30    |
|                                                                                                                      | Gemcitabine  | 4                   | 5    | 490                                                      | 26    | 490   | 2600  | 490  | 260   | 490  | 260   | 490  | 260   |
|                                                                                                                      |              | 5                   | 4    | 980                                                      | 13    | 980   | 1300  | 980  | 130   | 980  | 130   | 980  | 130   |
|                                                                                                                      |              | 5                   | 5    | 980                                                      | 26    | 980   | 2600  | 980  | 260   | 980  | 260   | 980  | 260   |
|                                                                                                                      | Ixabepilone  | 4                   | 4    | 490                                                      | 50    | 490   | 10    | 490  | 10    | 490  | 50    | 490  | 12.5  |
|                                                                                                                      |              | 4                   | 5    | 490                                                      | 100   | 490   | 20    | 490  | 20    | 490  | 100   | 490  | 25    |
|                                                                                                                      |              | 5                   | 1    | 980                                                      | 6.25  | 980   | 1.25  | 980  | 1.25  | 980  | 6.25  | 980  | 1.56  |
|                                                                                                                      |              | 5                   | 2    | 980                                                      | 12.5  | 980   | 2.5   | 980  | 2.5   | 980  | 12.5  | 980  | 3.13  |
|                                                                                                                      |              | 5                   | 3    | 980                                                      | 25    | 980   | 5     | 980  | 5     | 980  | 25    | 980  | 6.25  |
|                                                                                                                      |              | 5                   | 4    | 980                                                      | 50    | 980   | 10    | 980  | 10    | 980  | 50    | 980  | 12.5  |
|                                                                                                                      | Panobinostat | 5                   | 5    | 980                                                      | 100   | 980   | 20    | 980  | 20    | 980  | 100   | 980  | 25    |
|                                                                                                                      |              | 5                   | 1    | 980                                                      | 0.875 | 980   | 0.875 | 980  | 0.875 | 980  | 0.875 | 980  | 0.875 |
|                                                                                                                      |              | 5                   | 2    | 980                                                      | 1.75  | 980   | 1.75  | 980  | 1.75  | 980  | 1.75  | 980  | 1.75  |
|                                                                                                                      |              | 5                   | 3    | 980                                                      | 3.5   | 980   | 3.5   | 980  | 3.5   | 980  | 3.5   | 980  | 3.5   |
|                                                                                                                      | Regorafenib  | 5                   | 4    | 980                                                      | 7     | 980   | 7     | 980  | 7     | 980  | 7     | 980  | 7     |
|                                                                                                                      |              | 5                   | 5    | 980                                                      | 15000 | 980   | 15000 | 980  | 15000 | 980  | 15000 | 980  | 3900  |
|                                                                                                                      | Romidepsin   | 4                   | 4    | 490                                                      | 100   | 490   | 12.5  | 490  | 75    | 490  | 100   | 490  | 100   |
|                                                                                                                      |              | 4                   | 5    | 490                                                      | 200   | 490   | 25    | 490  | 150   | 490  | 200   | 490  | 200   |
|                                                                                                                      |              | 5                   | 1    | 980                                                      | 12.5  | 980   | 1.56  | 980  | 9.4   | 980  | 12.5  | 980  | 12.5  |
| 5                                                                                                                    |              | 2                   | 980  | 25                                                       | 980   | 3.13  | 980   | 18.8 | 980   | 25   | 980   | 25   |       |
| 5                                                                                                                    |              | 3                   | 980  | 50                                                       | 980   | 6.25  | 980   | 37.5 | 980   | 50   | 980   | 50   |       |
| 5                                                                                                                    |              | 4                   | 980  | 100                                                      | 980   | 12.5  | 980   | 75   | 980   | 100  | 980   | 100  |       |
| Romidepsin                                                                                                           | 5            | 5                   | 980  | 200                                                      | 980   | 25    | 980   | 150  | 980   | 200  | 980   | 200  |       |
|                                                                                                                      | 4            | 4                   | 100  | 13                                                       | 100   | 1300  | 75    | 130  | 100   | 130  | 100   | 130  |       |
|                                                                                                                      | 4            | 5                   | 100  | 26                                                       | 100   | 2600  | 75    | 260  | 100   | 260  | 100   | 260  |       |
|                                                                                                                      | 5            | 1                   | 200  | 1.63                                                     | 200   | 163   | 150   | 16.3 | 200   | 16.3 | 200   | 16.3 |       |
|                                                                                                                      | 5            | 3                   | 200  | 6.5                                                      | 200   | 650   | 150   | 65   | 200   | 65   | 200   | 65   |       |
|                                                                                                                      | 5            | 4                   | 200  | 13                                                       | 200   | 1300  | 150   | 130  | 200   | 130  | 200   | 130  |       |
| GSK923295A                                                                                                           | 5            | 5                   | 200  | 26                                                       | 200   | 2600  | 150   | 260  | 200   | 260  | 200   | 260  |       |
|                                                                                                                      | 5            | 3                   | 200  | 250                                                      | 200   | 250   | 150   | 1750 | 200   | 1750 | 200   | 1750 |       |
|                                                                                                                      | 5            | 4                   | 200  | 500                                                      | 200   | 500   | 150   | 3500 | 200   | 3500 | 200   | 3500 |       |
| 5                                                                                                                    | 5            | 200                 | 1000 | 200                                                      | 1000  | 150   | 7000  | 200  | 7000  | 200  | 7000  |      |       |



**Supplemental Table S3.** Concentrations of drugs used in the 45 combinations tested across 5 osteosarcoma cell lines.

| <b>IC50 and Fold-Of-Potential (FOP) Values of Top 6 Combinations</b> |                     |                         |                |                        |                    |                         |                |                        |                     |
|----------------------------------------------------------------------|---------------------|-------------------------|----------------|------------------------|--------------------|-------------------------|----------------|------------------------|---------------------|
| Tx1                                                                  | Tx2                 | Tx1 Single IC50 (ng/mL) | Tx2 Conc Index | Tx1 Combo IC50 (ng/mL) | Tx1 FOP            | Tx2 Single IC50 (ng/mL) | Tx1 Conc Index | Tx2 Combo IC50 (ng/mL) | Tx2 FOP             |
| <b>Bortezomib</b>                                                    | <b>Panobinostat</b> | 7.45                    | 1              | 5.45                   | <b>1.37 ± 0.53</b> | 11.85                   | 1              | 4.42                   | <b>2.68 ± 1.95</b>  |
|                                                                      |                     |                         | 2              | 7.72                   | <b>0.96 ± 0.56</b> |                         | 2              | 2.93                   | <b>4.04 ± 1.95</b>  |
|                                                                      |                     |                         | 3              | 5.03                   | <b>1.48 ± 0.56</b> |                         | 3              | 3.09                   | <b>3.83 ± 1.23</b>  |
|                                                                      |                     |                         | 4              | 4.21                   | <b>1.77 ± 0.59</b> |                         | 4              | 2.71                   | <b>4.37 ± 0.93</b>  |
|                                                                      |                     |                         | 5              | 4.35                   | <b>1.71 ± 0.51</b> |                         | 5              | 2.46                   | <b>4.81 ± 1.29</b>  |
| <b>Bortezomib</b>                                                    | <b>Romidepsin</b>   | 7.45                    | 1              | 5.29                   | <b>1.41 ± 0.45</b> | 20.02                   | 1              | 15.96                  | <b>1.25 ± 0.64</b>  |
|                                                                      |                     |                         | 2              | 4.73                   | <b>1.57 ± 0.60</b> |                         | 2              | 8.19                   | <b>2.45 ± 1.01</b>  |
|                                                                      |                     |                         | 3              | 4.80                   | <b>1.55 ± 0.52</b> |                         | 3              | 4.92                   | <b>4.07 ± 2.45</b>  |
|                                                                      |                     |                         | 4              | 4.35                   | <b>1.71 ± 0.81</b> |                         | 4              | 3.77                   | <b>5.31 ± 3.36</b>  |
|                                                                      |                     |                         | 5              | 3.02                   | <b>2.46 ± 1.07</b> |                         | 5              | 2.96                   | <b>6.75 ± 4.51</b>  |
| <b>Carfilzomib</b>                                                   | <b>Panobinostat</b> | 23.25                   | 1              | 17.35                  | <b>1.34 ± 0.65</b> | 11.85                   | 1              | 20.02                  | <b>0.59 ± 0.38</b>  |
|                                                                      |                     |                         | 2              | 17.52                  | <b>1.33 ± 0.44</b> |                         | 2              | 9.98                   | <b>1.19 ± 0.52</b>  |
|                                                                      |                     |                         | 3              | 12.62                  | <b>1.84 ± 0.54</b> |                         | 3              | 9.16                   | <b>1.29 ± 0.27</b>  |
|                                                                      |                     |                         | 4              | 9.95                   | <b>2.34 ± 0.66</b> |                         | 4              | 3.08                   | <b>3.84 ± 0.81</b>  |
|                                                                      |                     |                         | 5              | 8.39                   | <b>2.77 ± 0.80</b> |                         | 5              | 0.91                   | <b>13.00 ± 8.37</b> |
| <b>Carfilzomib</b>                                                   | <b>Romidepsin</b>   | 23.25                   | 1              | 15.19                  | <b>1.53 ± 0.50</b> | 20.02                   | 1              | 15.34                  | <b>1.31 ± 0.73</b>  |
|                                                                      |                     |                         | 2              | 10.74                  | <b>2.16 ± 0.66</b> |                         | 2              | 17.79                  | <b>1.13 ± 0.68</b>  |
|                                                                      |                     |                         | 3              | 5.38                   | <b>4.32 ± 1.66</b> |                         | 3              | 20.75                  | <b>0.96 ± 0.29</b>  |
|                                                                      |                     |                         | 4              | 8.74                   | <b>2.66 ± 1.26</b> |                         | 4              | 13.23                  | <b>1.51 ± 0.53</b>  |
|                                                                      |                     |                         | 5              | 6.17                   | <b>3.77 ± 1.69</b> |                         | 5              | 13.76                  | <b>1.45 ± 0.77</b>  |
| <b>MK1775</b>                                                        | <b>Ixabepilone</b>  | 208.33                  | 1              | 243.02                 | <b>0.86 ± 0.24</b> | 7.59                    | 1              | 8.26                   | <b>0.92 ± 0.48</b>  |
|                                                                      |                     |                         | 2              | 207.42                 | <b>1.00 ± 0.31</b> |                         | 2              | 6.02                   | <b>1.26 ± 0.74</b>  |
|                                                                      |                     |                         | 3              | 168.10                 | <b>1.24 ± 0.46</b> |                         | 3              | 5.63                   | <b>1.35 ± 0.75</b>  |
|                                                                      |                     |                         | 4              | 167.66                 | <b>1.24 ± 0.53</b> |                         | 4              | 8.21                   | <b>0.92 ± 0.47</b>  |
|                                                                      |                     |                         | 5              | 80.44                  | <b>2.59 ± 1.86</b> |                         | 5              | 6.00                   | <b>1.26 ± 0.65</b>  |
| <b>MK1775</b>                                                        | <b>Romidepsin</b>   | 208.33                  | 1              | 244.68                 | <b>0.85 ± 0.25</b> | 20.02                   | 1              | 12.31                  | <b>1.63 ± 1.00</b>  |
|                                                                      |                     |                         | 2              | 251.42                 | <b>0.83 ± 0.24</b> |                         | 2              | 25.60                  | <b>0.78 ± 0.45</b>  |
|                                                                      |                     |                         | 3              | 260.52                 | <b>0.80 ± 0.29</b> |                         | 3              | 26.31                  | <b>0.76 ± 0.48</b>  |
|                                                                      |                     |                         | 4              | 239.76                 | <b>0.87 ± 0.34</b> |                         | 4              | 42.39                  | <b>0.47 ± 0.22</b>  |
|                                                                      |                     |                         | 5              | 155.55                 | <b>1.34 ± 0.61</b> |                         | 5              | 3.85                   | <b>5.19 ± 5.38</b>  |

**Supplemental Table S4.** IC50 and fold-of-potential (FOP) values of bortezomib:romidepsin and bortezomib:panobinostat tested across 5 osteosarcoma cell lines.





**Supplemental Table S5.** Order-of-addition results of top 6 two-drug combinations assessed across 5 osteosarcoma cell lines where FA is  $\geq 0.95$  in at least one cell line and averaged CI is  $\leq 0.9$ .

## **SUPPLEMENTAL LEGENDS**

**Supplemental Figure S1.** Combination screening for drug synergy in osteosarcoma. A, schematic of 5x5 checker-board matrix used for high-throughput screening of drug combinations. B, dose-response curves were obtained for each drug for each cell line. C, synergy calculations were done using the Chou and Talalay combination index (CI), based on the median-effect and mass-action principles. An example of combination screening results (carfilzomib and romidepsin in 143B) showed strong synergism ( $CI < 0.5$ ) with  $>96\%$  anti-tumor activity for combinations with carfilzomib at 30ng/mL and romidepsin at 12.5 ng/mL, 25 ng/mL, and 50 ng/mL. Results are for concurrent drug applications at 72 hours using CellTiter-Glo viability assay. FA = fraction affected

**Supplemental Figure S2.** Combination screening results. Mixlow synergy analysis of carfilzomib +panobinostat, carfilzomib+romidepsin, MK1775+ixabepilone, MK1775+romidepsin combinations demonstrating synergy (index $<1$ ) at high cytotoxic levels (FA $>0.9$ ).

# Supplemental Figure S1.

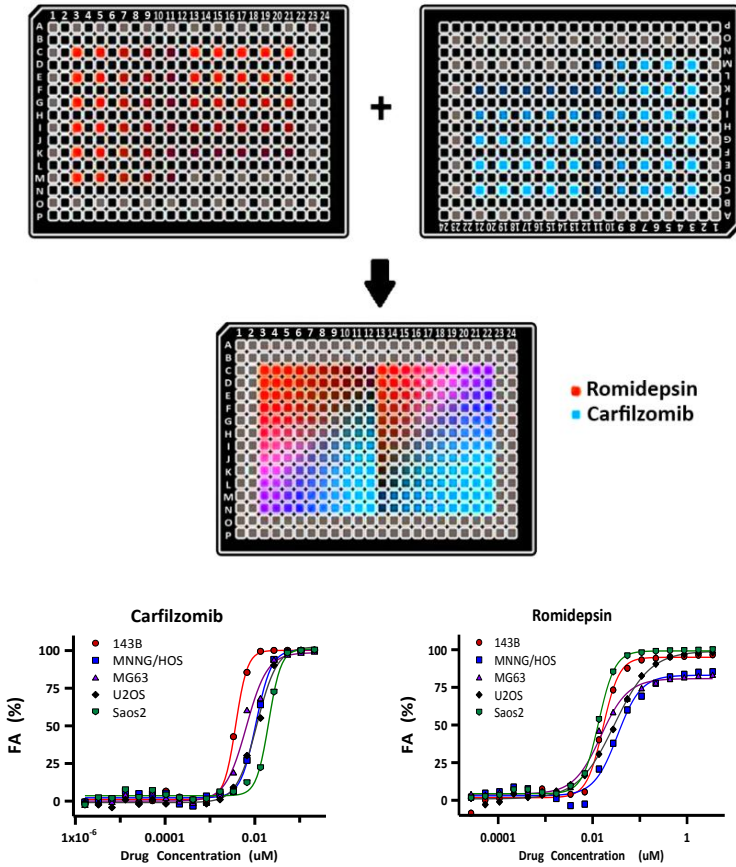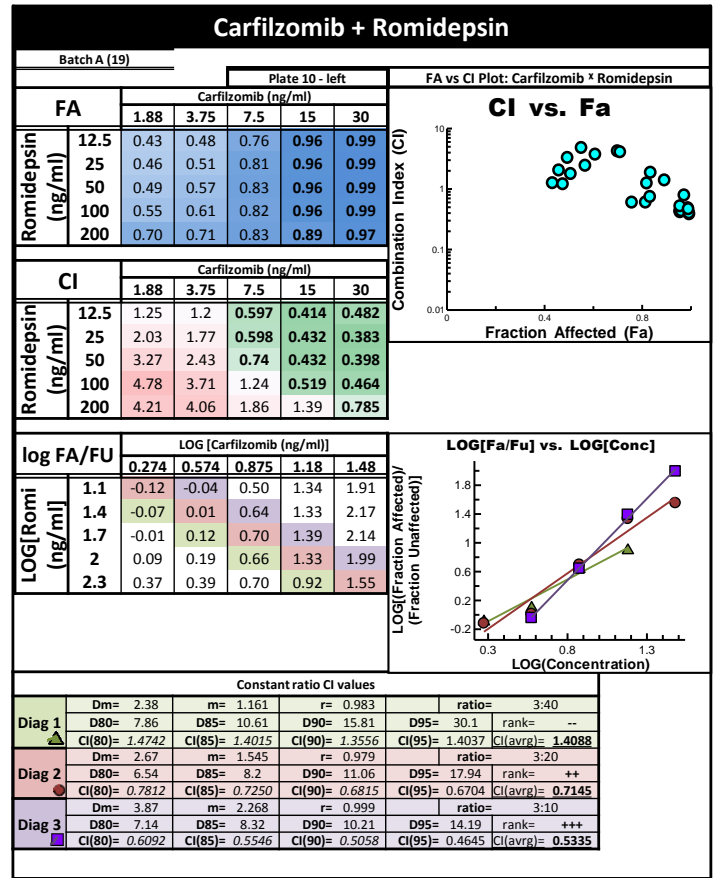

Supplemental Figure S2.

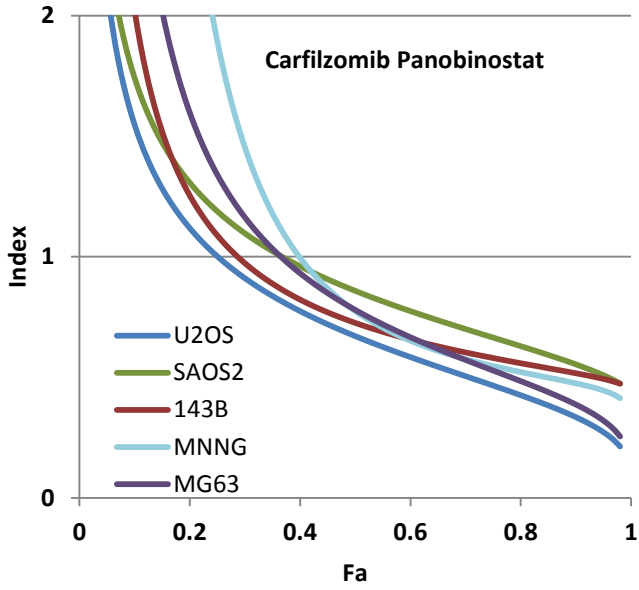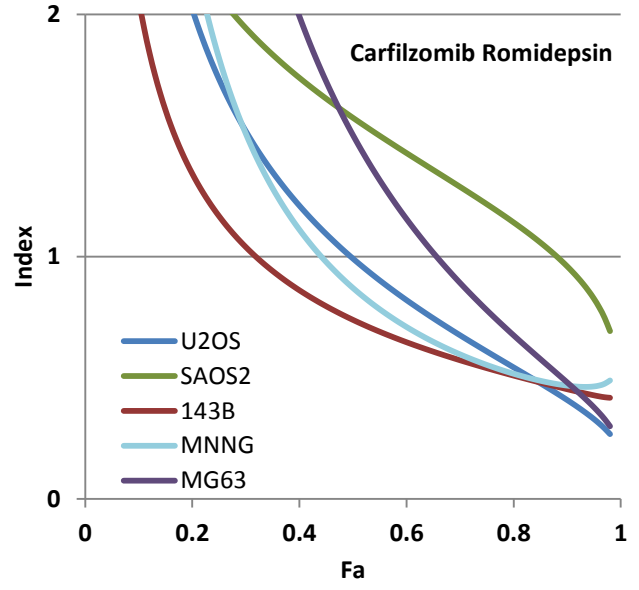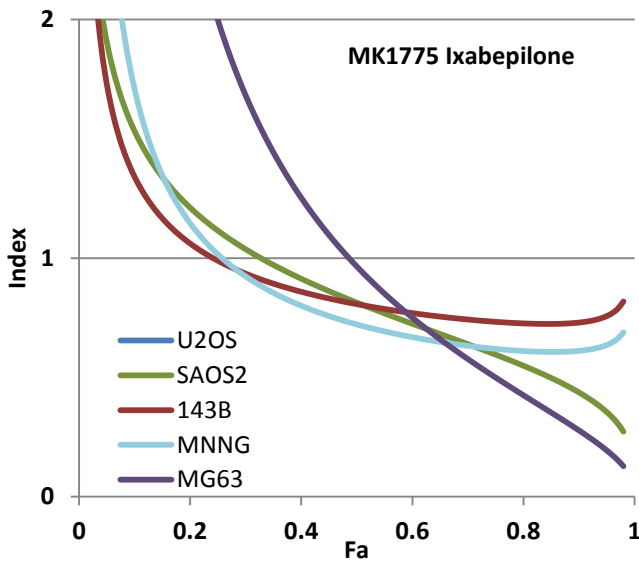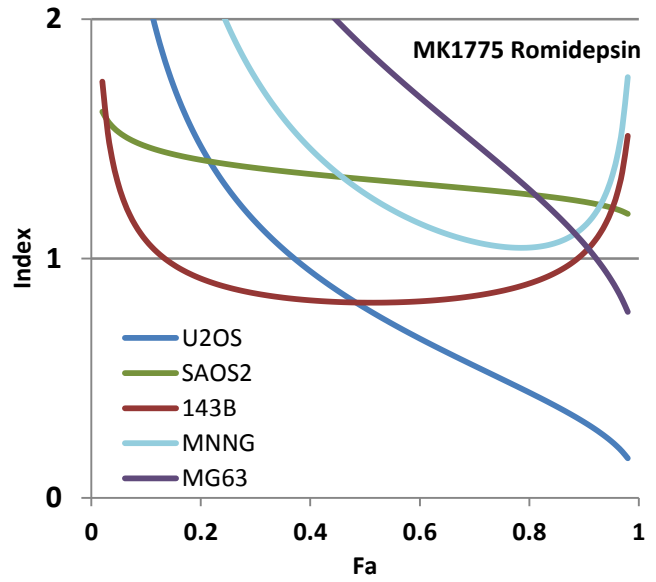

Supplement: srep16991-s1.pdf [file srep16991-s1.pdf]
